# Supplementary material
Source: MDPI journal article supplement (https://www.mdpi.com/2078-2489/14/1/21)
Supplement: s1 [file s1]

# Explainability Comparison between Random Forests and Neural Networks— Case Study of Amino Acid Volume Prediction: supplemental document

This is a supplementary document for inclusion of material with submission to Information journals. This document, which may include supplementary information such as expanded descriptions of materials and figures and tables, will be published as a PDF linked to the primary article. The supplemental file should only present information that would be useful and worthwhile for the reader, for example, details that would be necessary to reproduce an experiment. The article, however, must be coherent without the supplemental PDF file.

## 1. DATA-SET

In this section it's possible to find the original data-set, downloaded from <https://www.rcsb.org/>. The original data-set is composed by 446 files belonging to myoglobins and 6 file about spike proteins. The Spike files will be only preprocessed and inserted into Rosy and Roberta Database (DBR<sup>2</sup>) but not analyzed. The reason of this choice is due to a preliminary analysis of the data-set: after an alignment among the primary sequences, it has been clarified that the definition of the structures of spike proteins of the COVID-19 weren't, up to date, not fully assessed and the number of proteins deposited and catalogued were small, reducing the variance. The files attached, show the PDB codes of the relative proteins downloaded with other information-i.e. Entity ID, Asym ID, Auth Asym ID, Database Name, Accession Code(s), Sequence, Polymer Entity Sequence Length, Entity Macromolecule Type, Molecular Weight- that could be useful for a preliminary analysis of the data-set, giving a general overview of the case study.

## 2. RESULTS

As described in the paper, the analysis is composed by 3 different parts:

- Analysis on the most frequent amino acid found in the myoglobins, as described in the Section 6.1 of the paper: lysine (LYS), whose results are graphs, representing the feature importance for the prediction obtained with both Random Forest (RF) and Multilayer Perceptron Neural Network (MLP). On the y-axis there is the name of the feature, while on the x-axis there is the relative score obtained in the prediction, sorted by descending order [S1a](#) and [S1b](#). The analysis continues with an extension of the data-set, considering a wider amino acid's around, Figure [S2a](#), [S2b](#), [S3a](#) and [S3b](#)
- Analysis on all the amino acids but processed separately- described in Section 6.2-, re-training the two predictors on 20 csv files, and storing the results obtained in tables. The tables [S1](#), [S2](#), [S3](#), [S4](#), [S5](#) and [S6](#), show on the row the 20 different amino acids, and on the columns the 6 best features obtained, with their scores and the MSE, RMSE, MAE. Then the best features obtained have been dropped from the data-set, and retraining the algorithms, we obtained the results shown in the tables [S7](#), [S8](#), [S9](#), [S10](#), [S11](#) and [S12](#)
- Analysis on all the amino acids but processed together, -Section 6.3- training the algorithms on a unique csv file with all the data detected for every occurrence and storing Features Importance (FI) graphs [S4a](#) and [S4b](#). The same analysis is replicated but dropping the best one feature from the data-set, obtaining the results shown in [S5a](#) and [S5b](#)

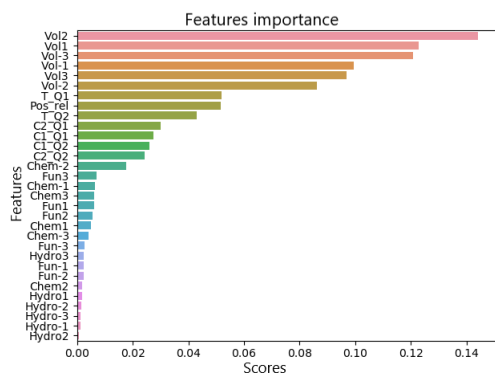

(a) Analysis with RF

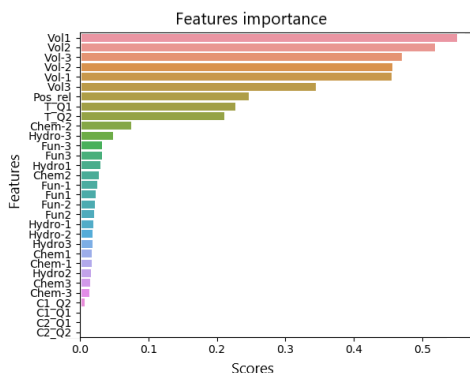

(b) Analysis with MLP

**Fig. S1.** Feature importance obtained for Lysine volume prediction, trained using data about the 3 amino acids preceding and following the Amino acid 0 (AA<sub>0</sub>) in the primary sequence of the protein.

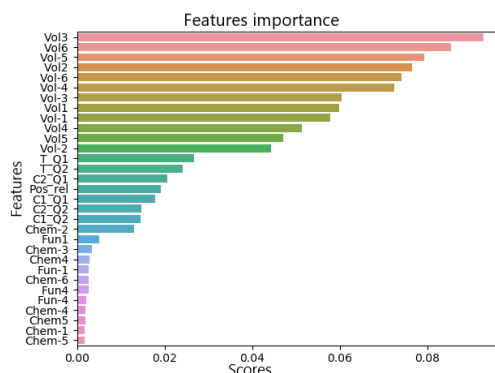

(a) Analysis with RF

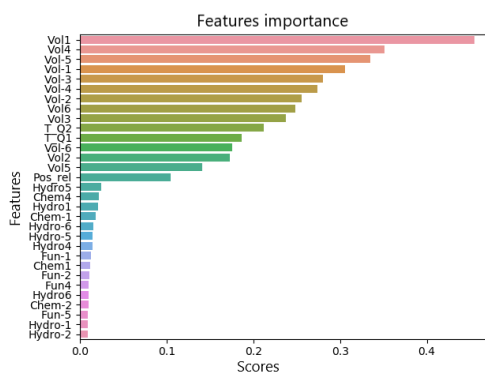

(b) Analysis with MLP

**Fig. S2.** Feature importance obtained for Lysine volume prediction, trained using data about the 6 amino acids preceding and following the AA<sub>0</sub> in the primary sequence of the protein.

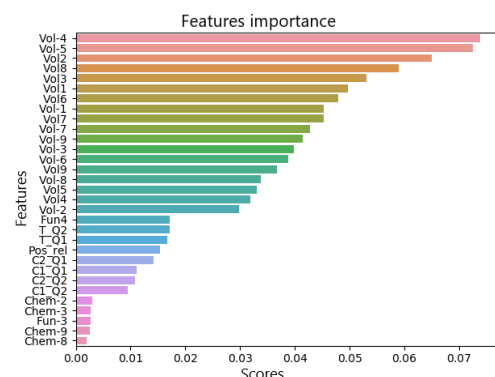

(a) Analysis with RF

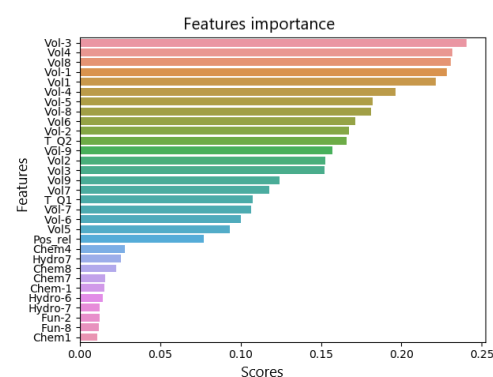

(b) Analysis with MLP

**Fig. S3.** Feature importance obtained for Lysine volume prediction, trained using data about the 9 amino acids preceding and following the AA<sub>0</sub> in the primary sequence of the protein.

**Table S1.** Features Importance RF: the features and their scores, that have most influenced lysine volume prediction, training RF on data set containing information about the 3 amino acids preceding and following AA<sub>0</sub> in the primary sequence of the protein.

| Amino | FREQ | F1     | Val    | F2      | Val    | F3      | Val    | F4    | Val    | F5     | Val    | F6    | Val    | MAE     | MSE      | RMS     |
|-------|------|--------|--------|---------|--------|---------|--------|-------|--------|--------|--------|-------|--------|---------|----------|---------|
| GLY   | 5672 | Vol-1  | 0,1834 | Vol1    | 0,1433 | Vol2    | 0,1418 | Vol-3 | 0,1146 | Vol-2  | 0,0986 | Vol3  | 0,0886 | 0,5385  | 1,0601   | 1,0296  |
| ALA   | 7694 | Vol1   | 0,1926 | Vol-2   | 0,1664 | Vol-3   | 0,1513 | Vol-1 | 0,1087 | Vol2   | 0,1003 | Vol3  | 0,0741 | 0,7402  | 2,4231   | 1,5566  |
| VAL   | 3572 | Vol-3  | 0,1964 | Vol3    | 0,1649 | Vol2    | 0,1461 | Vol-2 | 0,1087 | Vol-1  | 0,0944 | Vol1  | 0,0925 | 1,8636  | 11,9905  | 3,4627  |
| LEU   | 8229 | Vol-3  | 0,1423 | Vol1    | 0,1414 | Vol3    | 0,1320 | Vol2  | 0,1259 | Vol-1  | 0,1127 | Vol-2 | 0,0952 | 2,8407  | 22,0444  | 4,6951  |
| ILE   | 4101 | Vol3   | 0,1533 | Fun2    | 0,1480 | Vol1    | 0,1404 | Vol2  | 0,1218 | Vol-3  | 0,0887 | Vol-2 | 0,0765 | 2,6804  | 23,1006  | 4,8063  |
| MET   | 1105 | Vol2   | 0,3989 | Vol-2   | 0,1980 | Vol1    | 0,1033 | Vol-1 | 0,0746 | Vol3   | 0,0658 | Vol-3 | 0,0570 | 3,8676  | 43,4884  | 6,5946  |
| PRO   | 1879 | Vol1   | 0,3227 | Vol-1   | 0,1904 | Vol3    | 0,1225 | Vol2  | 0,0906 | Vol-3  | 0,0613 | Vol-2 | 0,0479 | 1,6259  | 7,8896   | 2,8088  |
| SER   | 2723 | Vol1   | 0,1933 | Vol-3   | 0,1618 | T_Q2    | 0,1341 | Vol-2 | 0,1130 | Vol3   | 0,0795 | Vol2  | 0,0756 | 1,0704  | 3,8359   | 1,9586  |
| THR   | 2575 | Vol2   | 0,2915 | Vol-1   | 0,2099 | Vol-2   | 0,1409 | Vol1  | 0,0693 | Vol3   | 0,0497 | Vol-3 | 0,0493 | 1,6654  | 7,3203   | 2,7056  |
| CYS   | 12   | Vol-1  | 0,0988 | Chem-1  | 0,0791 | Vol2    | 0,0772 | T_Q2  | 0,0665 | Hydro1 | 0,0656 | Vol3  | 0,0600 | 4,3423  | 20,7714  | 4,5576  |
| ASN   | 850  | Vol1   | 0,2073 | Vol2    | 0,2048 | T_Q2    | 0,0737 | Vol-3 | 0,0659 | Vol3   | 0,0649 | Vol-2 | 0,0579 | 2,4039  | 14,6888  | 3,8326  |
| GLN   | 2504 | Vol2   | 0,1905 | Vol-1   | 0,1839 | Pos_rel | 0,1160 | Vol1  | 0,1028 | Vol-3  | 0,0776 | Vol3  | 0,0715 | 5,9150  | 90,3575  | 9,5057  |
| PHE   | 2928 | Vol-3  | 0,2460 | Vol-2   | 0,1669 | Vol3    | 0,1348 | Vol1  | 0,0921 | Vol-1  | 0,0864 | Vol2  | 0,0603 | 4,6112  | 62,6633  | 7,9160  |
| TYR   | 1275 | Vol2   | 0,2504 | Vol-3   | 0,1506 | Vol-2   | 0,1411 | Vol-1 | 0,1132 | Vol3   | 0,0805 | Vol1  | 0,0575 | 5,1439  | 84,7859  | 9,2079  |
| TRP   | 947  | Vol-1  | 0,3870 | Vol3    | 0,2328 | Vol2    | 0,0798 | Vol1  | 0,0582 | Vol-2  | 0,0537 | Fun2  | 0,0477 | 4,8437  | 129,4846 | 11,3791 |
| LYS   | 8821 | Vol2   | 0,1441 | Vol1    | 0,1229 | Vol-3   | 0,1208 | Vol-1 | 0,0994 | Vol3   | 0,0969 | Vol-2 | 0,0861 | 9,1833  | 186,7161 | 13,6644 |
| HIS   | 5258 | Vol-1  | 0,2123 | Vol3    | 0,1802 | Vol2    | 0,1481 | Vol-2 | 0,1170 | Vol-3  | 0,1014 | Vol1  | 0,0608 | 3,3231  | 32,2098  | 5,6754  |
| ARG   | 1572 | Vol1   | 0,2031 | Pos_rel | 0,1527 | Vol2    | 0,1064 | Vol-3 | 0,0884 | Vol3   | 0,0781 | Vol-2 | 0,0726 | 10,5045 | 291,1569 | 17,0633 |
| ASP   | 3293 | Chem-2 | 0,2049 | Vol3    | 0,1764 | Vol-2   | 0,1586 | Vol1  | 0,1174 | Vol-3  | 0,0749 | Vol2  | 0,0523 | 2,8097  | 20,4244  | 4,5193  |
| GLU   | 6404 | Vol-2  | 0,1971 | Vol1    | 0,1445 | Vol-1   | 0,1183 | Vol3  | 0,0856 | Vol2   | 0,0854 | Chem3 | 0,0694 | 5,2578  | 69,3417  | 8,3272  |

**Table S2.** Features Importance MLP: the features and their scores, that have most influenced lysine volume prediction, training MLP on data set containing information about the 3 amino acids preceding and following AA<sub>0</sub> in the primary sequence of the protein.

| Amino | FREQ | F1      | Val    | F2      | Val    | F3      | Val    | F4      | Val    | F5      | Val    | F6      | Val    | MAE     | MSE      | RMS     |
|-------|------|---------|--------|---------|--------|---------|--------|---------|--------|---------|--------|---------|--------|---------|----------|---------|
| GLY   | 5672 | Pos_rel | 0,1315 | T_Q1    | 0,1271 | T_Q2    | 0,1196 | Hydro-6 | 0,0853 | Chem4   | 0,0770 | Hydro3  | 0,0692 | 1,6121  | 4,9393   | 2,2225  |
| ALA   | 7694 | T_Q2    | 0,0918 | T_Q1    | 0,0826 | Pos_rel | 0,0532 | Hydro-4 | 0,0403 | Hydro-5 | 0,0315 | Chem-5  | 0,0152 | 1,8956  | 8,2349   | 2,8697  |
| VAL   | 3572 | Chem8   | 0,1403 | Hydro-8 | 0,0864 | Chem-1  | 0,0454 | Hydro-4 | 0,0360 | T_Q1    | 0,0357 | Chem-4  | 0,0257 | 4,1212  | 36,6524  | 6,0541  |
| LEU   | 8229 | T_Q2    | 0,1240 | T_Q1    | 0,1189 | Chem-6  | 0,0663 | Hydro5  | 0,0639 | Hydro-2 | 0,0391 | Chem5   | 0,0372 | 6,7312  | 93,1337  | 9,6506  |
| ILE   | 4101 | T_Q1    | 0,0211 | Pos_rel | 0,0182 | Hydro5  | 0,0157 | Hydro9  | 0,0128 | T_Q2    | 0,0105 | Hydro-8 | 0,0103 | 6,8182  | 93,1517  | 9,6515  |
| MET   | 1105 | Chem9   | 0,0771 | Hydro-2 | 0,0678 | Chem-1  | 0,0470 | Pos_rel | 0,0342 | Chem-3  | 0,0321 | T_Q2    | 0,0298 | 7,6145  | 124,5784 | 11,1615 |
| SER   | 2723 | Pos_rel | 0,2545 | T_Q2    | 0,1299 | T_Q1    | 0,0989 | Chem5   | 0,0587 | Chem9   | 0,0378 | Fun-5   | 0,0267 | 2,8237  | 16,9648  | 4,1188  |
| PRO   | 1879 | T_Q1    | 0,0614 | T_Q2    | 0,0240 | Pos_rel | 0,0237 | Chem-4  | 0,0175 | Hydro3  | 0,0119 | Chem-7  | 0,0105 | 3,7529  | 48,0048  | 6,9286  |
| THR   | 2575 | T_Q1    | 0,1608 | T_Q2    | 0,1483 | Chem7   | 0,0364 | Fun-5   | 0,0134 | Hydro-4 | 0,0133 | Hydro1  | 0,0132 | 3,7133  | 30,9326  | 5,5617  |
| CYS   | 12   | T_Q1    | 0,0461 | Pos_rel | 0,0084 | Chem-9  | 0,0022 | Chem3   | 0,0013 | Fun-6   | 0,0012 | Hydro-6 | 0,0011 | 2,0410  | 5,0489   | 2,2470  |
| ASN   | 850  | T_Q2    | 0,1876 | Pos_rel | 0,1855 | Chem-9  | 0,0669 | Hydro-3 | 0,0644 | Hydro-9 | 0,0525 | Chem2   | 0,0451 | 3,9476  | 25,3953  | 5,0394  |
| GLN   | 2504 | Pos_rel | 0,1150 | T_Q1    | 0,0434 | Hydro-9 | 0,0407 | Chem-9  | 0,0287 | Fun-9   | 0,0286 | Chem-6  | 0,0224 | 10,7624 | 211,8817 | 14,5562 |
| PHE   | 2928 | Chem-1  | 0,1004 | Hydro7  | 0,0528 | Chem-7  | 0,0439 | T_Q1    | 0,0433 | T_Q2    | 0,0312 | Chem7   | 0,0219 | 12,1458 | 261,9531 | 16,1850 |
| TYR   | 1275 | T_Q1    | 0,0296 | Pos_rel | 0,0202 | Fun4    | 0,0162 | Hydro4  | 0,0140 | Chem4   | 0,0061 | Chem6   | 0,0044 | 14,0738 | 328,5074 | 18,1248 |
| TRP   | 947  | Hydro1  | 0,0123 | Fun1    | 0,0079 | Chem-2  | 0,0025 | Chem-6  | 0,0007 | Chem7   | 0,0004 | Hydro8  | 0,0001 | 8,6417  | 204,3007 | 14,2934 |
| LYS   | 8821 | T_Q2    | 0,2676 | T_Q1    | 0,1934 | Pos_rel | 0,1222 | Hydro-9 | 0,0480 | Chem-5  | 0,0471 | Chem4   | 0,0396 | 15,6154 | 451,5171 | 21,2489 |
| HIS   | 5258 | T_Q2    | 0,3339 | T_Q1    | 0,2945 | Hydro8  | 0,0734 | Chem6   | 0,0733 | Chem3   | 0,0508 | Pos_rel | 0,0467 | 7,5599  | 122,2233 | 11,0555 |
| ARG   | 1572 | Pos_rel | 0,1728 | T_Q2    | 0,1509 | T_Q1    | 0,1340 | Chem4   | 0,1005 | Chem1   | 0,0110 | Hydro3  | 0,0099 | 15,9363 | 591,0136 | 24,3108 |
| ASP   | 3293 | T_Q2    | 0,1385 | Pos_rel | 0,0930 | T_Q1    | 0,0785 | Chem-4  | 0,0656 | Chem6   | 0,0423 | Chem-6  | 0,0224 | 5,1691  | 46,9522  | 6,8522  |
| GLU   | 6404 | T_Q1    | 0,2719 | T_Q2    | 0,1062 | Hydro-5 | 0,0477 | Hydro-1 | 0,0395 | Chem-1  | 0,0308 | Pos_rel | 0,0306 | 9,7335  | 160,3813 | 12,6642 |

**Table S3.** Features Importance RF: the features and their scores, that have most influenced lysine volume prediction, training RF on data set containing information about the 6 amino acids preceding and following AA<sub>0</sub> in the primary sequence of the protein

| Amino | FREQ | F1      | Val    | F2    | Val    | F3      | Val    | F4    | Val    | F5     | Val    | F6    | Val    | MAE     | MSE      | RMS     |
|-------|------|---------|--------|-------|--------|---------|--------|-------|--------|--------|--------|-------|--------|---------|----------|---------|
| GLY   | 5672 | Vol1    | 0,1698 | Vol-1 | 0,1033 | Vol5    | 0,1001 | Vol2  | 0,0916 | Vol-5  | 0,0889 | Vol4  | 0,0693 | 0,5151  | 1,0495   | 1,0244  |
| ALA   | 7694 | Vol1    | 0,1384 | Vol-3 | 0,0851 | Vol3    | 0,0735 | Vol-2 | 0,0721 | Vol-6  | 0,0699 | Vol-1 | 0,0694 | 0,6254  | 1,4676   | 1,2114  |
| VAL   | 3572 | Vol4    | 0,2384 | Vol-6 | 0,1291 | Vol-3   | 0,0920 | Vol-4 | 0,0801 | Vol2   | 0,0751 | Vol5  | 0,0718 | 1,4999  | 8,4438   | 2,9058  |
| LEU   | 8229 | Vol-5   | 0,1410 | Vol1  | 0,1047 | Vol-3   | 0,0874 | Vol3  | 0,0855 | Vol4   | 0,0683 | Vol5  | 0,0649 | 2,5713  | 19,2820  | 4,3911  |
| ILE   | 4101 | Vol4    | 0,1442 | Fun2  | 0,1438 | Vol1    | 0,0908 | Vol-5 | 0,0699 | Vol5   | 0,0650 | Vol-4 | 0,0612 | 2,4010  | 16,3103  | 4,0386  |
| MET   | 1105 | Vol2    | 0,3211 | Vol-2 | 0,1964 | Vol6    | 0,1458 | Vol-4 | 0,0649 | Vol-1  | 0,0536 | Vol4  | 0,0333 | 2,8892  | 33,9461  | 5,8263  |
| PRO   | 1879 | Vol1    | 0,2198 | Vol-6 | 0,1313 | Vol5    | 0,1036 | Vol-1 | 0,0823 | Vol3   | 0,0810 | Vol2  | 0,0545 | 1,4459  | 7,1697   | 2,6776  |
| SER   | 2723 | Vol1    | 0,1513 | Vol-5 | 0,0994 | Vol6    | 0,0880 | Vol-2 | 0,0819 | Vol2   | 0,0818 | T_Q2  | 0,0802 | 1,0899  | 3,3742   | 1,8369  |
| THR   | 2575 | Vol2    | 0,2530 | Vol-1 | 0,1098 | Vol-2   | 0,0965 | Vol5  | 0,0864 | Vol6   | 0,0651 | Vol4  | 0,0526 | 1,4738  | 6,0494   | 2,4595  |
| CYS   | 12   | Vol-1   | 0,0692 | Vol-3 | 0,0544 | Vol6    | 0,0500 | Vol4  | 0,0497 | Chem-6 | 0,0495 | Fun2  | 0,0459 | 3,4113  | 14,6685  | 3,8299  |
| ASN   | 850  | Vol6    | 0,3460 | Vol1  | 0,1414 | Vol4    | 0,0697 | Vol2  | 0,0499 | Chem-2 | 0,0450 | Vol-4 | 0,0414 | 2,0666  | 9,8000   | 3,1305  |
| GLN   | 2504 | Pos_rel | 0,1510 | Vol5  | 0,0980 | Vol2    | 0,0839 | Vol-3 | 0,0838 | Vol-1  | 0,0829 | Vol4  | 0,0651 | 4,4296  | 60,6124  | 7,7854  |
| PHE   | 2928 | Vol-3   | 0,2148 | Vol-2 | 0,1099 | Vol3    | 0,1066 | Vol6  | 0,0888 | Vol5   | 0,0705 | Vol-1 | 0,0659 | 3,5674  | 41,6460  | 6,4534  |
| TYR   | 1275 | Vol-4   | 0,2747 | Vol-3 | 0,1355 | Vol-6   | 0,1111 | Vol2  | 0,0936 | T_Q2   | 0,0561 | Vol3  | 0,0471 | 4,0024  | 60,1347  | 7,7547  |
| TRP   | 947  | Vol-1   | 0,3685 | Vol3  | 0,2009 | Vol5    | 0,0521 | Vol2  | 0,0520 | Vol6   | 0,0421 | Vol-5 | 0,0382 | 4,3107  | 84,9141  | 9,2149  |
| LYS   | 8821 | Vol3    | 0,0928 | Vol6  | 0,0855 | Vol-5   | 0,0792 | Vol2  | 0,0765 | Vol-6  | 0,0742 | Vol-4 | 0,0725 | 8,5886  | 166,4297 | 12,9008 |
| HIS   | 5258 | Vol-1   | 0,1669 | Vol3  | 0,1296 | Vol2    | 0,0886 | Vol-2 | 0,0781 | Vol-4  | 0,0714 | Vol-3 | 0,0655 | 3,1346  | 31,0062  | 5,5683  |
| ARG   | 1572 | Vol-6   | 0,3594 | Fun4  | 0,1299 | Vol-4   | 0,0748 | Vol-3 | 0,0704 | Vol-2  | 0,0539 | Vol1  | 0,0416 | 10,1136 | 304,4501 | 17,4485 |
| ASP   | 3293 | Pos_rel | 0,2639 | Vol-2 | 0,1132 | Vol3    | 0,1116 | Vol5  | 0,0906 | Vol1   | 0,0645 | Vol-4 | 0,0384 | 2,5156  | 17,3905  | 4,1702  |
| GLU   | 6404 | Vol-2   | 0,1956 | Vol5  | 0,0665 | Pos_rel | 0,0658 | Vol1  | 0,0601 | Vol-5  | 0,0542 | Vol-1 | 0,0508 | 5,1794  | 73,8164  | 8,5916  |

**Table S4.** Features Importance MLP: the features and their scores, that have most influenced lysine volume prediction, training MLP on data set containing information about the 6 amino acids preceding and following AA<sub>0</sub> in the primary sequence of the protein.

| Amino | FREQ | F1    | Val    | F2    | Val    | F3      | Val    | F4      | Val    | F5    | Val    | F6      | Val    | MAE     | MSE      | RMS     |
|-------|------|-------|--------|-------|--------|---------|--------|---------|--------|-------|--------|---------|--------|---------|----------|---------|
| GLY   | 5672 | Vol4  | 0,8673 | Vol-1 | 0,4215 | Vol-4   | 0,4098 | Vol-3   | 0,3903 | Vol2  | 0,3813 | Vol6    | 0,3737 | 0,5085  | 0,7594   | 0,8714  |
| ALA   | 7694 | Vol1  | 1,4419 | Vol-4 | 0,5580 | Vol-5   | 0,4331 | Pos_rel | 0,3939 | Vol5  | 0,3824 | Vol4    | 0,3394 | 0,7305  | 1,4633   | 1,2097  |
| VAL   | 3572 | Vol4  | 1,1559 | Vol-6 | 0,4463 | Vol1    | 0,4160 | Vol-3   | 0,3949 | Vol-4 | 0,3714 | Vol5    | 0,3635 | 1,6341  | 6,8890   | 2,6247  |
| LEU   | 8229 | Vol-1 | 0,4251 | Vol4  | 0,4047 | Vol6    | 0,3624 | Vol-4   | 0,3512 | Vol2  | 0,3358 | Vol-5   | 0,2403 | 3,2581  | 25,3667  | 5,0365  |
| ILE   | 4101 | Vol-6 | 0,5187 | Vol-4 | 0,4597 | Vol4    | 0,4170 | Vol2    | 0,2938 | Vol-5 | 0,2915 | Vol1    | 0,2804 | 2,8417  | 19,6795  | 4,4362  |
| MET   | 1105 | Vol-1 | 0,5654 | Vol2  | 0,4929 | Vol-2   | 0,4103 | Vol-4   | 0,1614 | Vol1  | 0,1040 | Vol5    | 0,0931 | 3,7151  | 45,7790  | 6,7660  |
| PRO   | 1879 | T_Q1  | 0,3476 | Vol1  | 0,3094 | Vol-4   | 0,2590 | Vol-6   | 0,2550 | Vol-2 | 0,2497 | Vol3    | 0,2369 | 1,6850  | 6,8611   | 2,6194  |
| SER   | 2724 | T_Q3  | 1,4744 | Vol3  | 1,4588 | Vol5    | 1,4509 | Vol-3   | 1,4495 | Vol2  | 1,3373 | Vol-5   | 1,2768 | 2,1998  | 4,4646   | 2,8613  |
| THR   | 2575 | Vol-1 | 0,4314 | Vol-4 | 0,4114 | Vol6    | 0,2878 | Vol3    | 0,2839 | Vol4  | 0,2494 | T_Q1    | 0,2378 | 1,6942  | 6,7493   | 2,5979  |
| CYS   | 12   | Vol-5 | 0,1259 | Vol-6 | 0,1185 | Vol-1   | 0,1120 | Vol3    | 0,1030 | T_Q1  | 0,0631 | Vol-2   | 0,0405 | 1,2641  | 1,7082   | 1,3070  |
| ASN   | 850  | Vol2  | 0,8380 | Vol-1 | 0,3149 | Vol-4   | 0,2613 | Vol3    | 0,2600 | Vol6  | 0,2263 | Pos_rel | 0,1752 | 2,3500  | 11,8889  | 3,4480  |
| GLN   | 2504 | Vol-4 | 0,4817 | Vol2  | 0,3209 | Vol5    | 0,3043 | Vol3    | 0,2857 | Vol1  | 0,2547 | Vol-1   | 0,2423 | 5,1583  | 72,9790  | 8,5428  |
| PHE   | 2928 | Vol-3 | 0,5594 | Vol6  | 0,4829 | Vol-2   | 0,4828 | Vol4    | 0,4686 | Vol1  | 0,4298 | Vol-4   | 0,3567 | 4,2988  | 50,0656  | 7,0757  |
| TYR   | 1275 | Vol5  | 0,9281 | Vol-4 | 0,2171 | Vol4    | 0,1906 | Vol2    | 0,1505 | Vol1  | 0,1477 | Vol-2   | 0,1361 | 6,2633  | 125,2519 | 11,1916 |
| TRP   | 947  | Vol5  | 0,5520 | Vol-1 | 0,1844 | Vol-2   | 0,1755 | Vol3    | 0,1442 | Vol2  | 0,1135 | Vol1    | 0,1106 | 5,1088  | 117,5901 | 10,8439 |
| LYS   | 8821 | Vol1  | 0,3911 | Vol4  | 0,3503 | Vol-5   | 0,3327 | Vol-1   | 0,3124 | Vol-3 | 0,2793 | Vol2    | 0,2666 | 9,9423  | 205,4248 | 14,3326 |
| HIS   | 5258 | Vol3  | 0,4523 | Vol-5 | 0,3744 | Vol6    | 0,2888 | Vol2    | 0,2843 | Vol-2 | 0,2445 | T_Q2    | 0,2402 | 3,4216  | 31,2673  | 5,5917  |
| ARG   | 1572 | Vol-4 | 0,1843 | Vol6  | 0,1735 | Pos_rel | 0,1557 | Vol-5   | 0,1504 | Vol-3 | 0,1346 | T_Q2    | 0,1289 | 10,2748 | 276,1318 | 16,6172 |
| ASP   | 3293 | Vol5  | 0,5271 | Vol-4 | 0,4231 | Vol-1   | 0,3460 | Vol-2   | 0,3097 | Vol2  | 0,3093 | Vol-5   | 0,2822 | 2,8240  | 19,1003  | 4,3704  |
| GLU   | 6404 | Vol1  | 0,3760 | Vol3  | 0,2407 | Vol-2   | 0,2318 | Vol-5   | 0,2241 | Vol-3 | 0,2139 | Vol6    | 0,2020 | 5,8611  | 84,9153  | 9,2149  |

**Table S5.** Features Importance RF: the features and their scores, that have most influenced lysine volume prediction, training RF on data set containing information about the 9 amino acids preceding and following AA<sub>0</sub> in the primary sequence of the protein.

| Amino | FREQ | F1      | Val    | F2    | Val    | F3    | Val    | F4    | Val    | F5     | Val    | F6      | Val    | MAE     | MSE      | RMS     |
|-------|------|---------|--------|-------|--------|-------|--------|-------|--------|--------|--------|---------|--------|---------|----------|---------|
| GLY   | 5672 | Vol1    | 0,1773 | Vol9  | 0,0836 | Vol2  | 0,0790 | Vol-1 | 0,0720 | Vol4   | 0,0644 | Vol-9   | 0,0576 | 0,4468  | 0,7666   | 0,8755  |
| ALA   | 7694 | Vol1    | 0,1093 | Vol9  | 0,0824 | Vol-2 | 0,0739 | Vol6  | 0,0693 | Vol5   | 0,0661 | Vol-4   | 0,0500 | 0,6009  | 1,3414   | 1,1582  |
| VAL   | 3572 | Vol-8   | 0,1201 | Vol7  | 0,1055 | Vol5  | 0,0895 | Vol4  | 0,0804 | Vol-6  | 0,0788 | Vol-4   | 0,0704 | 1,5162  | 6,9590   | 2,6380  |
| LEU   | 8229 | Vol-5   | 0,0818 | Vol3  | 0,0744 | Vol8  | 0,0691 | Vol1  | 0,0611 | Vol-3  | 0,0592 | Vol-7   | 0,0571 | 2,4643  | 16,8462  | 4,1044  |
| ILE   | 4101 | Fun2    | 0,1432 | Vol7  | 0,1140 | Vol1  | 0,0785 | Vol4  | 0,0666 | Vol-7  | 0,0584 | Vol9    | 0,0559 | 2,2002  | 12,6165  | 3,5520  |
| MET   | 1105 | Vol-7   | 0,3166 | Vol2  | 0,2078 | Vol-4 | 0,0628 | Vol6  | 0,0494 | Vol-6  | 0,0475 | Vol-2   | 0,0383 | 3,0405  | 32,3352  | 5,6864  |
| PRO   | 1879 | Vol9    | 0,2120 | Vol-8 | 0,1307 | Vol1  | 0,1075 | Vol-6 | 0,0789 | Vol-7  | 0,0608 | Vol-1   | 0,0586 | 1,3758  | 5,7758   | 2,4033  |
| SER   | 2723 | Vol-7   | 0,1271 | Vol-5 | 0,1178 | Vol8  | 0,0838 | Vol1  | 0,0703 | Vol6   | 0,0679 | Vol-3   | 0,0631 | 1,0885  | 3,4037   | 1,8449  |
| THR   | 2575 | Vol2    | 0,1954 | Vol-9 | 0,1434 | Vol7  | 0,0720 | Vol-2 | 0,0679 | Vol5   | 0,0644 | Vol-1   | 0,0590 | 1,4648  | 5,6602   | 2,3791  |
| CYS   | 12   | Pos_rel | 0,0356 | Vol-8 | 0,0329 | Fun-8 | 0,0312 | Vol-1 | 0,0306 | Chem-2 | 0,0268 | Vol-3   | 0,0255 | 1,6509  | 4,8096   | 2,1931  |
| ASN   | 850  | Vol6    | 0,2940 | Vol1  | 0,1147 | Vol-9 | 0,0661 | Vol4  | 0,0529 | Vol9   | 0,0463 | Vol2    | 0,0430 | 1,8991  | 8,5390   | 2,9222  |
| GLN   | 2504 | Vol1    | 0,1914 | Vol5  | 0,1320 | Vol-3 | 0,1207 | Vol2  | 0,1103 | Vol4   | 0,0644 | Vol3    | 0,0332 | 5,1124  | 70,1302  | 8,3744  |
| PHE   | 2928 | Vol-3   | 0,1923 | Vol-7 | 0,1044 | Vol8  | 0,1000 | Vol6  | 0,0802 | Vol3   | 0,0740 | Vol-5   | 0,0703 | 3,4181  | 37,1660  | 6,0964  |
| TYR   | 1275 | Vol-3   | 0,2488 | Vol-9 | 0,1096 | Vol-6 | 0,0832 | Fun-5 | 0,0808 | Vol-2  | 0,0794 | Vol8    | 0,0621 | 4,6987  | 71,3403  | 8,4463  |
| TRP   | 947  | Vol3    | 0,2127 | Vol-3 | 0,1332 | Vol-7 | 0,1058 | Vol9  | 0,1005 | Vol-4  | 0,0544 | Vol-2   | 0,0444 | 4,2929  | 58,8710  | 7,6727  |
| LYS   | 8821 | Vol-4   | 0,0738 | Vol-5 | 0,0725 | Vol2  | 0,0649 | Vol8  | 0,0589 | Vol3   | 0,0531 | Vol1    | 0,0497 | 8,5366  | 165,8054 | 12,8765 |
| HIS   | 5258 | Vol8    | 0,1570 | Vol-1 | 0,0777 | Vol-4 | 0,0707 | Vol3  | 0,0657 | Vol9   | 0,0602 | T_Q1    | 0,0479 | 2,8392  | 24,4970  | 4,9494  |
| ARG   | 1572 | Vol-6   | 0,3469 | Fun4  | 0,1020 | Vol-3 | 0,0605 | Vol9  | 0,0574 | Vol-4  | 0,0557 | Vol-2   | 0,0495 | 10,1957 | 303,4559 | 17,4200 |
| ASP   | 3293 | Pos_rel | 0,2579 | Vol-2 | 0,1090 | Vol3  | 0,0912 | Vol9  | 0,0591 | Vol-7  | 0,0557 | Vol1    | 0,0467 | 2,5252  | 16,4076  | 4,0506  |
| GLU   | 6404 | Vol-2   | 0,2157 | Vol9  | 0,0850 | Vol1  | 0,0468 | Vol8  | 0,0449 | Vol-8  | 0,0410 | Pos_rel | 0,0407 | 4,9968  | 60,2162  | 7,7599  |

**Table S6.** Features Importance MLP: the features and their scores, that have most influenced lysine volume prediction, training MLP on data set containing information about the 9 amino acids preceding and following AA<sub>0</sub> in the primary sequence of the protein.

| Amino | FREQ | F1    | Val    | F2    | Val    | F3      | Val    | F4    | Val    | F5    | Val    | F6    | Val    | MAE     | MSE      | RMS     |
|-------|------|-------|--------|-------|--------|---------|--------|-------|--------|-------|--------|-------|--------|---------|----------|---------|
| GLY   | 5672 | Vol4  | 0,6262 | Vol-3 | 0,4771 | Vol8    | 0,4374 | Vol-1 | 0,2824 | Vol2  | 0,2592 | Vol7  | 0,2531 | 0,4813  | 0,6144   | 0,7839  |
| ALA   | 7694 | Vol1  | 0,4943 | Vol5  | 0,4866 | Vol4    | 0,3666 | Vol-9 | 0,2977 | Vol-4 | 0,2831 | Vol-8 | 0,2807 | 0,6569  | 1,1581   | 1,0762  |
| VAL   | 3572 | Vol4  | 0,4700 | Vol-7 | 0,3716 | Vol1    | 0,3591 | Vol-3 | 0,3255 | Vol-8 | 0,3251 | Vol-6 | 0,3206 | 1,7685  | 6,9803   | 2,6420  |
| LEU   | 8229 | Vol8  | 0,2856 | Vol4  | 0,2808 | Vol-4   | 0,2532 | Vol-9 | 0,2408 | Vol2  | 0,2404 | Vol-1 | 0,2148 | 3,2014  | 22,8169  | 4,7767  |
| ILE   | 4101 | Vol7  | 0,6416 | Vol-4 | 0,5097 | Vol4    | 0,3186 | Vol-6 | 0,2919 | Vol-7 | 0,2615 | Vol9  | 0,1442 | 2,6705  | 17,1133  | 4,1368  |
| MET   | 1105 | Vol-1 | 0,4665 | Vol2  | 0,4102 | Vol-2   | 0,1858 | Vol8  | 0,1009 | Vol-7 | 0,0743 | Vol-5 | 0,0571 | 4,1665  | 63,7989  | 7,9874  |
| PRO   | 1879 | Vol1  | 0,3496 | Vol-8 | 0,3342 | T_Q1    | 0,2380 | Vol-6 | 0,2231 | Vol3  | 0,1837 | Vol2  | 0,1473 | 1,5146  | 6,7319   | 2,5946  |
| SER   | 2724 | Vol5  | 1,3331 | Vol-9 | 1,2909 | Vol3    | 1,2698 | Vol2  | 1,2647 | T_Q3  | 1,2569 | Vol-3 | 1,2529 | 2,0998  | 4,1364   | 2,7710  |
| THR   | 2575 | Vol7  | 0,4619 | Vol-4 | 0,2654 | Vol-1   | 0,2355 | Vol1  | 0,2344 | Vol6  | 0,2228 | Vol2  | 0,2097 | 1,7111  | 7,2330   | 2,6894  |
| CYS   | 12   | Vol5  | 0,0155 | Vol-7 | 0,0065 | Pos_rel | 0,0046 | Vol-3 | 0,0028 | Vol-1 | 0,0012 | Vol1  | 0,0010 | 1,2494  | 2,6384   | 1,6243  |
| ASN   | 850  | Vol2  | 0,8157 | Vol-8 | 0,2706 | Vol-4   | 0,1940 | Vol1  | 0,1858 | Vol6  | 0,1492 | Vol-7 | 0,1091 | 2,1876  | 10,1797  | 3,1906  |
| GLN   | 2504 | Vol-4 | 0,4470 | Vol1  | 0,4387 | Vol2    | 0,2434 | Vol3  | 0,1984 | Vol4  | 0,1841 | Vol5  | 0,1513 | 5,6628  | 87,1403  | 9,3349  |
| PHE   | 2928 | Vol8  | 0,5194 | Vol4  | 0,3965 | Vol-3   | 0,3691 | Vol-8 | 0,3168 | Vol5  | 0,2785 | Vol-4 | 0,2507 | 3,8403  | 38,6336  | 6,2156  |
| TYR   | 1275 | Vol-3 | 0,2027 | Vol-4 | 0,1286 | Vol5    | 0,1003 | Vol9  | 0,0983 | Vol-6 | 0,0565 | Vol2  | 0,0494 | 7,1454  | 144,7457 | 12,0310 |
| TRP   | 947  | Vol-8 | 0,2164 | Vol-3 | 0,2085 | Vol-7   | 0,1919 | Vol5  | 0,1302 | Vol4  | 0,0777 | Vol9  | 0,0571 | 5,5169  | 107,7148 | 10,3786 |
| LYS   | 8821 | Vol-4 | 0,2317 | Vol8  | 0,2213 | Vol1    | 0,2192 | Vol-3 | 0,2125 | Vol-5 | 0,2035 | Vol-1 | 0,2006 | 9,4384  | 187,7494 | 13,7022 |
| HIS   | 5258 | Vol-5 | 0,2910 | Vol3  | 0,2669 | Vol8    | 0,2639 | T_Q2  | 0,2584 | Vol6  | 0,2439 | Vol2  | 0,2262 | 3,3458  | 28,8594  | 5,3721  |
| ARG   | 1572 | Vol-3 | 0,1355 | Vol-5 | 0,1349 | T_Q1    | 0,1202 | Vol7  | 0,1089 | Vol-6 | 0,1033 | Vol9  | 0,0999 | 10,2835 | 274,4339 | 16,5660 |
| ASP   | 3293 | Vol5  | 0,3949 | Vol-4 | 0,3304 | Vol-8   | 0,2699 | Vol-2 | 0,2640 | Vol-1 | 0,2595 | Vol-5 | 0,2462 | 2,7899  | 17,8939  | 4,2301  |
| GLU   | 6404 | Vol1  | 0,2157 | Vol-2 | 0,2125 | T_Q2    | 0,1968 | Vol9  | 0,1760 | Vol-3 | 0,1721 | Vol-1 | 0,1657 | 5,4416  | 65,0220  | 8,0636  |

**Table S7.** Features Importance RF: the features and their scores, that have most influenced lysine volume prediction, training RF on data set containing information about the 3 amino acids preceding and following AA<sub>0</sub> in the primary sequence of the protein without considering their volumes.

| Amino | FREQ | F1      | Val    | F2      | Val    | F3      | Val    | F4     | Val    | F5      | Val    | F6      | Val    | MAE     | MSE      | RMS     |
|-------|------|---------|--------|---------|--------|---------|--------|--------|--------|---------|--------|---------|--------|---------|----------|---------|
| GLY   | 5672 | Pos_rel | 0,1666 | T_Q2    | 0,1434 | T_Q1    | 0,1395 | C2_Q1  | 0,1222 | C1_Q1   | 0,1086 | C1_Q2   | 0,1054 | 1,2735  | 4,1107   | 2,0275  |
| ALA   | 7694 | T_Q1    | 0,1639 | T_Q2    | 0,1559 | C1_Q1   | 0,1237 | C1_Q2  | 0,1166 | C2_Q2   | 0,1149 | Pos_rel | 0,1133 | 1,6812  | 9,4946   | 3,0813  |
| VAL   | 3572 | T_Q1    | 0,1732 | T_Q2    | 0,1491 | C1_Q1   | 0,1157 | C2_Q1  | 0,1030 | C1_Q2   | 0,0988 | Pos_rel | 0,0984 | 3,7327  | 37,3959  | 6,1152  |
| LEU   | 8229 | Pos_rel | 0,1599 | T_Q1    | 0,1497 | T_Q2    | 0,1329 | C1_Q1  | 0,0996 | C2_Q1   | 0,0992 | C2_Q2   | 0,0963 | 5,2988  | 73,3236  | 8,5629  |
| ILE   | 4101 | Pos_rel | 0,1668 | Fun2    | 0,1480 | T_Q2    | 0,1280 | T_Q1   | 0,1206 | C1_Q2   | 0,1073 | C2_Q1   | 0,0984 | 5,0065  | 68,3621  | 8,2681  |
| MET   | 1105 | T_Q1    | 0,1356 | T_Q2    | 0,1259 | Pos_rel | 0,1022 | Chem-1 | 0,0967 | C2_Q2   | 0,0852 | C1_Q2   | 0,0837 | 6,7622  | 114,7796 | 10,7135 |
| PRO   | 1879 | T_Q1    | 0,1947 | Pos_rel | 0,1419 | C2_Q1   | 0,1417 | T_Q2   | 0,1304 | C1_Q1   | 0,1204 | C2_Q2   | 0,0959 | 3,3439  | 42,6728  | 6,5324  |
| SER   | 2723 | T_Q2    | 0,2709 | T_Q1    | 0,1701 | Pos_rel | 0,1085 | C2_Q2  | 0,1066 | C1_Q2   | 0,0982 | C1_Q1   | 0,0908 | 2,2181  | 13,3151  | 3,6490  |
| THR   | 2575 | T_Q1    | 0,2715 | Pos_rel | 0,1375 | T_Q2    | 0,1369 | C2_Q2  | 0,0972 | C2_Q1   | 0,0936 | C1_Q2   | 0,0884 | 3,0784  | 25,8705  | 5,0863  |
| CYS   | 12   | Hydro1  | 0,1050 | Fun-1   | 0,1019 | Hydro2  | 0,1017 | Fun2   | 0,0984 | Pos_rel | 0,0824 | Chem-1  | 0,0789 | 4,5023  | 28,4631  | 5,3351  |
| ASN   | 850  | T_Q1    | 0,1688 | Pos_rel | 0,1315 | T_Q2    | 0,1165 | C2_Q2  | 0,0847 | C1_Q1   | 0,0835 | C1_Q2   | 0,0810 | 3,2641  | 25,6902  | 5,0685  |
| GLN   | 2504 | Pos_rel | 0,2385 | T_Q1    | 0,1373 | T_Q2    | 0,1072 | C2_Q1  | 0,1061 | C1_Q1   | 0,0893 | C2_Q2   | 0,0863 | 10,0373 | 183,7821 | 13,5566 |
| PHE   | 2928 | Pos_rel | 0,1625 | T_Q2    | 0,1425 | T_Q1    | 0,1194 | C1_Q1  | 0,1015 | C2_Q2   | 0,0977 | C1_Q2   | 0,0966 | 9,1226  | 200,4889 | 14,1594 |
| TYR   | 1275 | T_Q2    | 0,1987 | Pos_rel | 0,1862 | T_Q1    | 0,1728 | C2_Q2  | 0,1064 | C2_Q1   | 0,0961 | C1_Q1   | 0,0881 | 9,7599  | 243,6182 | 15,6083 |
| TRP   | 947  | T_Q1    | 0,1722 | T_Q2    | 0,1505 | Chem2   | 0,1348 | C2_Q2  | 0,1091 | C1_Q2   | 0,1030 | Pos_rel | 0,1022 | 12,4209 | 443,2285 | 21,0530 |
| LYS   | 8821 | T_Q1    | 0,1570 | T_Q2    | 0,1504 | C2_Q2   | 0,1343 | C1_Q1  | 0,1166 | Pos_rel | 0,1110 | C1_Q2   | 0,1096 | 13,5857 | 383,1098 | 19,5732 |
| HIS   | 5258 | T_Q2    | 0,1687 | T_Q1    | 0,1517 | Pos_rel | 0,1193 | C2_Q2  | 0,1048 | C1_Q2   | 0,1014 | C1_Q1   | 0,0959 | 6,5153  | 106,9160 | 10,3400 |
| ARG   | 1572 | Pos_rel | 0,3813 | T_Q1    | 0,1822 | T_Q2    | 0,1118 | C2_Q2  | 0,0650 | C1_Q1   | 0,0648 | C1_Q2   | 0,0564 | 15,4856 | 611,0910 | 24,7203 |
| ASP   | 3293 | Chem-2  | 0,2085 | T_Q2    | 0,1335 | C1_Q1   | 0,1292 | T_Q1   | 0,1203 | Pos_rel | 0,0911 | C1_Q2   | 0,0878 | 4,4294  | 40,9467  | 6,3990  |
| GLU   | 6404 | Pos_rel | 0,1612 | T_Q2    | 0,1155 | T_Q1    | 0,1048 | Chem3  | 0,1001 | C2_Q1   | 0,0909 | C1_Q1   | 0,0861 | 8,0992  | 137,4181 | 11,7225 |

**Table S8.** Features Importance MLP: the features and their scores, that have most influenced lysine volume prediction, training MLP on data set containing information about the 3 amino acids preceding and following AA<sub>0</sub> in the protein without their volumes.

| Amino | FREQ | F1      | Val    | F2      | Val    | F3      | Val    | F4      | Val    | F5      | Val    | F6      | Val    | MAE     | MSE      | RMS     |
|-------|------|---------|--------|---------|--------|---------|--------|---------|--------|---------|--------|---------|--------|---------|----------|---------|
| GLY   | 5672 | Pos_rel | 0,1729 | T_Q2    | 0,0865 | T_Q1    | 0,0821 | Hydro3  | 0,0335 | Chem3   | 0,0285 | Chem1   | 0,0213 | 1,5946  | 4,9402   | 2,2227  |
| ALA   | 7694 | T_Q1    | 0,0535 | T_Q2    | 0,0527 | Pos_rel | 0,0477 | Chem-1  | 0,0287 | Chem-3  | 0,0093 | Chem2   | 0,0086 | 2,1218  | 11,1592  | 3,3405  |
| VAL   | 3572 | T_Q1    | 0,1570 | Pos_rel | 0,0884 | T_Q2    | 0,0300 | Hydro-2 | 0,0277 | Hydro2  | 0,0218 | Hydro-3 | 0,0123 | 4,8140  | 50,3098  | 7,0929  |
| LEU   | 8229 | Pos_rel | 0,2112 | Chem1   | 0,1053 | T_Q2    | 0,0804 | Hydro-2 | 0,0654 | T_Q1    | 0,0506 | Hydro1  | 0,0419 | 6,8586  | 93,2199  | 9,6550  |
| ILE   | 4101 | Pos_rel | 0,1116 | T_Q1    | 0,0796 | Chem-2  | 0,0504 | Hydro1  | 0,0425 | Fun2    | 0,0346 | T_Q2    | 0,0324 | 6,8473  | 93,7131  | 9,6806  |
| MET   | 1105 | Hydro-2 | 0,1481 | T_Q2    | 0,0340 | Chem-3  | 0,0244 | Chem-1  | 0,0204 | T_Q1    | 0,0198 | Chem1   | 0,0197 | 7,8958  | 118,5317 | 10,8872 |
| PRO   | 1879 | T_Q1    | 0,0575 | Pos_rel | 0,0415 | T_Q2    | 0,0137 | Hydro3  | 0,0097 | Fun-3   | 0,0065 | Chem-2  | 0,0059 | 3,9080  | 47,1117  | 6,8638  |
| SER   | 2724 | T_Q2    | 1,2521 | Pos_rel | 1,2485 | T_Q3    | 1,1391 | Hydro3  | 1,0566 | Chem3   | 1,0508 | Fun-3   | 1,0216 | 3,7085  | 16,6581  | 4,9570  |
| THR   | 2575 | T_Q1    | 0,4352 | T_Q2    | 0,1135 | Chem-1  | 0,0173 | Chem-2  | 0,0169 | Hydro-3 | 0,0144 | Pos_rel | 0,0143 | 3,8131  | 31,5964  | 5,6211  |
| CYS   | 12   | T_Q1    | 0,3208 | T_Q2    | 0,2766 | Pos_rel | 0,2482 | Chem-3  | 0,0471 | Hydro-3 | 0,0407 | Chem1   | 0,0187 | 3,4752  | 18,2250  | 4,2691  |
| ASN   | 850  | Pos_rel | 0,4484 | T_Q2    | 0,4362 | Hydro1  | 0,1821 | T_Q1    | 0,1371 | Chem2   | 0,0957 | Hydro-3 | 0,0290 | 4,1435  | 33,6089  | 5,7973  |
| GLN   | 2504 | Pos_rel | 0,2281 | T_Q1    | 0,0966 | T_Q2    | 0,0839 | Hydro1  | 0,0575 | Hydro-2 | 0,0311 | Chem-2  | 0,0249 | 11,1820 | 205,7520 | 14,3441 |
| PHE   | 2928 | Chem-1  | 0,1171 | Fun-1   | 0,0411 | T_Q1    | 0,0379 | T_Q2    | 0,0373 | Hydro-1 | 0,0211 | Hydro1  | 0,0135 | 11,4726 | 248,3436 | 15,7589 |
| TYR   | 1275 | Pos_rel | 0,1112 | T_Q2    | 0,1107 | T_Q1    | 0,0723 | Hydro1  | 0,0288 | Chem1   | 0,0203 | Fun1    | 0,0092 | 12,9676 | 318,9281 | 17,8586 |
| TRP   | 947  | Hydro2  | 0,0578 | Hydro-3 | 0,0547 | Chem2   | 0,0380 | Fun2    | 0,0327 | T_Q1    | 0,0273 | Chem-1  | 0,0124 | 15,7977 | 541,6705 | 23,2738 |
| LYS   | 8821 | T_Q2    | 0,1458 | T_Q1    | 0,0895 | Pos_rel | 0,0781 | Chem-2  | 0,0773 | Chem3   | 0,0558 | Chem-1  | 0,0473 | 16,5806 | 479,7815 | 21,9039 |
| HIS   | 5258 | T_Q2    | 0,2151 | T_Q1    | 0,0870 | Pos_rel | 0,0783 | Chem3   | 0,0314 | Hydro-1 | 0,0102 | Hydro1  | 0,0097 | 8,5671  | 140,7214 | 11,8626 |
| ARG   | 1572 | Pos_rel | 0,4912 | T_Q1    | 0,2465 | T_Q2    | 0,1879 | Chem1   | 0,0126 | Hydro-1 | 0,0070 | Fun-2   | 0,0053 | 17,4146 | 674,7626 | 25,9762 |
| ASP   | 3293 | T_Q1    | 0,1578 | T_Q2    | 0,1140 | Pos_rel | 0,1000 | Hydro2  | 0,0300 | Fun2    | 0,0254 | Chem1   | 0,0243 | 5,6960  | 55,6428  | 7,4594  |
| GLU   | 6404 | Pos_rel | 0,2161 | T_Q1    | 0,1922 | T_Q2    | 0,1526 | Hydro-1 | 0,0531 | Hydro-2 | 0,0420 | Chem-2  | 0,0385 | 10,4980 | 184,3700 | 13,5783 |

**Table S9.** Features Importance RF: the features and their scores, that have most influenced lysine volume prediction, training RF on data set containing information about the 6 amino acids preceding and following AA<sub>0</sub> in the protein without their volumes.

| Amino | FREQ | F1      | Val    | F2      | Val    | F3      | Val    | F4      | Val    | F5      | Val    | F6      | Val    | MAE     | MSE      | RMS     |
|-------|------|---------|--------|---------|--------|---------|--------|---------|--------|---------|--------|---------|--------|---------|----------|---------|
| GLY   | 5672 | Pos_rel | 0,1737 | T_Q2    | 0,1409 | T_Q1    | 0,1263 | C2_Q1   | 0,1029 | C1_Q2   | 0,0970 | C1_Q1   | 0,0968 | 1,2706  | 3,8456   | 1,9610  |
| ALA   | 7694 | T_Q1    | 0,1575 | T_Q2    | 0,1518 | C1_Q2   | 0,1178 | C2_Q2   | 0,1166 | C1_Q1   | 0,1087 | Pos_rel | 0,1041 | 1,5962  | 7,8409   | 2,8002  |
| VAL   | 3572 | T_Q1    | 0,1591 | T_Q2    | 0,1532 | C1_Q1   | 0,1052 | Pos_rel | 0,0975 | C2_Q1   | 0,0973 | C2_Q2   | 0,0918 | 3,1969  | 28,3987  | 5,3290  |
| LEU   | 8229 | Pos_rel | 0,1549 | T_Q1    | 0,1325 | T_Q2    | 0,1289 | C2_Q1   | 0,0908 | C1_Q1   | 0,0888 | C1_Q2   | 0,0878 | 5,3895  | 77,3227  | 8,7933  |
| ILE   | 4101 | Pos_rel | 0,1539 | Fun2    | 0,1475 | T_Q2    | 0,1271 | T_Q1    | 0,1162 | C1_Q2   | 0,1039 | C2_Q1   | 0,0932 | 4,8841  | 67,0290  | 8,1871  |
| MET   | 1105 | T_Q1    | 0,1285 | Pos_rel | 0,1231 | C2_Q1   | 0,1077 | T_Q2    | 0,1043 | C1_Q1   | 0,0986 | C1_Q2   | 0,0712 | 5,7727  | 108,9736 | 10,4390 |
| PRO   | 1879 | T_Q1    | 0,1882 | C2_Q1   | 0,1395 | Pos_rel | 0,1315 | T_Q2    | 0,1239 | C1_Q1   | 0,1065 | C2_Q2   | 0,0948 | 3,1011  | 40,2511  | 6,3444  |
| SER   | 2723 | T_Q2    | 0,2409 | T_Q1    | 0,1423 | Pos_rel | 0,1019 | C2_Q2   | 0,0996 | C1_Q1   | 0,0939 | C1_Q2   | 0,0912 | 2,3348  | 14,2305  | 3,7723  |
| THR   | 2575 | T_Q1    | 0,2560 | T_Q2    | 0,1224 | Pos_rel | 0,1223 | C2_Q2   | 0,0901 | C2_Q1   | 0,0880 | C1_Q2   | 0,0862 | 2,9837  | 25,3166  | 5,0316  |
| CYS   | 12   | Hydro2  | 0,1049 | Pos_rel | 0,0857 | Fun-1   | 0,0722 | T_Q1    | 0,0695 | Chem-6  | 0,0659 | Fun2    | 0,0654 | 3,9005  | 26,0431  | 5,1032  |
| ASN   | 850  | T_Q1    | 0,1482 | Pos_rel | 0,1058 | T_Q2    | 0,1048 | C2_Q2   | 0,0839 | C1_Q2   | 0,0787 | C1_Q1   | 0,0773 | 3,2059  | 24,9948  | 4,9995  |
| GLN   | 2504 | Pos_rel | 0,2200 | T_Q1    | 0,1448 | T_Q2    | 0,1039 | C2_Q1   | 0,0960 | C1_Q1   | 0,0907 | C1_Q2   | 0,0784 | 8,1344  | 156,4942 | 12,5098 |
| PHE   | 2928 | Pos_rel | 0,1509 | T_Q2    | 0,1356 | T_Q1    | 0,1200 | C1_Q2   | 0,1034 | C2_Q2   | 0,1011 | C1_Q1   | 0,0996 | 8,0773  | 155,0028 | 12,4500 |
| TYR   | 1275 | T_Q2    | 0,1987 | T_Q1    | 0,1769 | Pos_rel | 0,1427 | C1_Q2   | 0,1032 | C2_Q1   | 0,0938 | C1_Q1   | 0,0911 | 7,3757  | 161,3654 | 12,7030 |
| TRP   | 947  | T_Q2    | 0,1372 | T_Q1    | 0,1360 | Chem2   | 0,1356 | Pos_rel | 0,1024 | C2_Q1   | 0,1018 | C1_Q2   | 0,0920 | 10,4333 | 337,8107 | 18,3796 |
| LYS   | 8821 | T_Q1    | 0,1490 | T_Q2    | 0,1473 | C2_Q2   | 0,1278 | C1_Q1   | 0,1075 | Pos_rel | 0,1013 | C1_Q2   | 0,1012 | 13,3227 | 375,6712 | 19,3822 |
| HIS   | 5258 | T_Q2    | 0,1816 | T_Q1    | 0,1358 | Pos_rel | 0,1281 | C2_Q2   | 0,0951 | C1_Q2   | 0,0926 | C1_Q1   | 0,0857 | 6,0474  | 98,6265  | 9,9311  |
| ARG   | 1572 | Pos_rel | 0,2748 | T_Q1    | 0,1308 | Chem4   | 0,1230 | T_Q2    | 0,0879 | C1_Q1   | 0,0628 | C2_Q2   | 0,0569 | 14,9165 | 584,1808 | 24,1698 |
| ASP   | 3293 | Pos_rel | 0,3150 | T_Q2    | 0,1058 | T_Q1    | 0,1038 | C1_Q2   | 0,0840 | C1_Q1   | 0,0773 | C2_Q1   | 0,0760 | 4,1312  | 34,4588  | 5,8702  |
| GLU   | 6404 | Pos_rel | 0,1288 | Chem3   | 0,1064 | T_Q1    | 0,1040 | T_Q2    | 0,0999 | C2_Q2   | 0,0884 | Chem-2  | 0,0873 | 7,7240  | 127,5978 | 11,2959 |

**Table S10.** Features Importance MLP: the features and their scores, that have most influenced lysine volume prediction, training MLP on data set containing information about the 6 amino acids preceding and following AA<sub>0</sub> in the protein without their volumes.

| Amino | FREQ | F1      | Val    | F2      | Val    | F3      | Val    | F4      | Val    | F5      | Val    | F6      | Val    | MAE     | MSE      | RMS     |
|-------|------|---------|--------|---------|--------|---------|--------|---------|--------|---------|--------|---------|--------|---------|----------|---------|
| GLY   | 5672 | T_Q1    | 0,1249 | Pos_rel | 0,1086 | T_Q2    | 0,0923 | Hydro-6 | 0,0844 | Hydro3  | 0,0747 | Chem3   | 0,0500 | 1,6256  | 5,0569   | 2,2487  |
| ALA   | 7694 | T_Q2    | 0,0637 | Pos_rel | 0,0534 | T_Q1    | 0,0364 | Hydro-4 | 0,0361 | Hydro-5 | 0,0182 | Chem-5  | 0,0167 | 1,9387  | 8,9031   | 2,9838  |
| VAL   | 3572 | Pos_rel | 0,1220 | T_Q1    | 0,1141 | T_Q2    | 0,1071 | Hydro-4 | 0,0398 | Chem-1  | 0,0374 | Hydro-6 | 0,0309 | 4,4088  | 41,7691  | 6,4629  |
| LEU   | 8229 | T_Q1    | 0,1168 | Hydro5  | 0,1007 | T_Q2    | 0,0932 | Chem-6  | 0,0816 | Chem5   | 0,0650 | Hydro-2 | 0,0439 | 6,7841  | 93,2647  | 9,6574  |
| ILE   | 4101 | Pos_rel | 0,0385 | T_Q1    | 0,0262 | Hydro5  | 0,0221 | Chem-2  | 0,0194 | Hydro-6 | 0,0123 | T_Q2    | 0,0119 | 6,9205  | 94,5820  | 9,7253  |
| MET   | 1105 | Pos_rel | 0,0405 | Chem-1  | 0,0200 | Chem-2  | 0,0177 | Hydro-2 | 0,0164 | Chem-3  | 0,0128 | Hydro-1 | 0,0117 | 7,9650  | 138,5073 | 11,7689 |
| PRO   | 1879 | T_Q1    | 0,0390 | Pos_rel | 0,0068 | T_Q2    | 0,0055 | Hydro3  | 0,0051 | Fun6    | 0,0022 | Chem-2  | 0,0021 | 3,9733  | 48,7966  | 6,9855  |
| SER   | 2724 | Pos_rel | 1,2113 | T_Q3    | 1,1511 | T_Q2    | 1,1143 | Chem6   | 1,0559 | Fun-6   | 1,0233 | Chem3   | 1,0190 | 3,8249  | 17,6683  | 5,0827  |
| THR   | 2575 | T_Q1    | 0,1904 | T_Q2    | 0,1206 | Chem-1  | 0,0226 | Hydro1  | 0,0214 | Fun1    | 0,0202 | Chem-5  | 0,0158 | 3,6381  | 30,3610  | 5,5101  |
| CYS   | 12   | T_Q2    | 0,4996 | T_Q1    | 0,4818 | Pos_rel | 0,2295 | Chem5   | 0,0575 | Hydro-3 | 0,0419 | Fun3    | 0,0196 | 2,6678  | 10,4382  | 3,2308  |
| ASN   | 850  | Pos_rel | 0,6548 | T_Q2    | 0,3224 | T_Q1    | 0,0952 | Chem2   | 0,0843 | Chem-6  | 0,0335 | Hydro6  | 0,0251 | 4,1670  | 32,4074  | 5,6927  |
| GLN   | 2504 | Pos_rel | 0,1424 | T_Q1    | 0,0579 | Hydro1  | 0,0312 | T_Q2    | 0,0264 | Chem-2  | 0,0225 | Chem5   | 0,0179 | 10,7260 | 213,1497 | 14,5996 |
| PHE   | 2928 | Chem-1  | 0,0894 | T_Q1    | 0,0506 | Fun-1   | 0,0180 | Hydro6  | 0,0114 | Pos_rel | 0,0113 | Fun4    | 0,0112 | 11,2789 | 223,3444 | 14,9447 |
| TYR   | 1275 | T_Q1    | 0,1453 | T_Q2    | 0,1368 | Pos_rel | 0,0825 | Chem-4  | 0,0151 | Hydro4  | 0,0079 | Chem5   | 0,0068 | 11,5654 | 286,7572 | 16,9339 |
| TRP   | 947  | Hydro2  | 0,1120 | Fun2    | 0,0490 | Chem2   | 0,0235 | Hydro4  | 0,0166 | Chem4   | 0,0137 | Chem5   | 0,0128 | 15,5721 | 519,3814 | 22,7899 |
| LYS   | 8821 | T_Q2    | 0,2599 | Pos_rel | 0,1450 | T_Q1    | 0,1299 | Chem4   | 0,0751 | Hydro4  | 0,0405 | Chem-1  | 0,0295 | 16,0659 | 464,5117 | 21,5525 |
| HIS   | 5258 | T_Q2    | 0,3072 | T_Q1    | 0,2028 | Pos_rel | 0,1126 | Chem3   | 0,0635 | Chem6   | 0,0373 | Hydro2  | 0,0226 | 7,8663  | 128,2602 | 11,3252 |
| ARG   | 1572 | Pos_rel | 0,2158 | T_Q1    | 0,1498 | T_Q2    | 0,1356 | Chem4   | 0,1172 | Chem1   | 0,0109 | Hydro-1 | 0,0065 | 16,1652 | 601,9164 | 24,5340 |
| ASP   | 3293 | Pos_rel | 0,1867 | T_Q2    | 0,1818 | Chem6   | 0,1342 | T_Q1    | 0,1048 | Chem-4  | 0,0674 | Chem-6  | 0,0303 | 5,2004  | 48,9104  | 6,9936  |
| GLU   | 6404 | T_Q1    | 0,3068 | Pos_rel | 0,0952 | T_Q2    | 0,0941 | Hydro-5 | 0,0464 | Chem-4  | 0,0399 | Chem-2  | 0,0330 | 9,9959  | 175,3662 | 13,2426 |

**Table S11.** Features Importance RF: the features and their scores, that have most influenced lysine volume prediction, training RF on data set containing information about the 9 amino acids preceding and following AA<sub>0</sub> in the protein without their volumes.

| Amino | FREQ | F1      | Val    | F2      | Val    | F3      | Val    | F4      | Val    | F5     | Val    | F6     | Val    | MAE     | MSE      | RMS     |
|-------|------|---------|--------|---------|--------|---------|--------|---------|--------|--------|--------|--------|--------|---------|----------|---------|
| GLY   | 5672 | T_Q2    | 0,1342 | Pos_rel | 0,1243 | T_Q1    | 0,1187 | C2_Q1   | 0,1059 | C1_Q2  | 0,0924 | C1_Q1  | 0,0868 | 1,2317  | 3,9861   | 1,9965  |
| ALA   | 7694 | T_Q1    | 0,1518 | T_Q2    | 0,1449 | C1_Q1   | 0,1117 | C2_Q2   | 0,1085 | C1_Q2  | 0,1081 | C2_Q1  | 0,1057 | 1,5688  | 7,0250   | 2,6505  |
| VAL   | 3572 | T_Q2    | 0,1418 | T_Q1    | 0,1393 | C1_Q1   | 0,1088 | C1_Q2   | 0,0895 | C2_Q1  | 0,0872 | C2_Q2  | 0,0832 | 3,4376  | 31,9331  | 5,6509  |
| LEU   | 8229 | Pos_rel | 0,1303 | T_Q2    | 0,1270 | T_Q1    | 0,1224 | C1_Q1   | 0,0928 | C1_Q2  | 0,0862 | C2_Q2  | 0,0848 | 5,4283  | 77,6611  | 8,8126  |
| ILE   | 4101 | Pos_rel | 0,1476 | Fun2    | 0,1469 | T_Q2    | 0,1221 | T_Q1    | 0,1119 | C1_Q2  | 0,0994 | C2_Q1  | 0,0901 | 4,8464  | 64,8402  | 8,0523  |
| MET   | 1105 | T_Q1    | 0,1394 | T_Q2    | 0,1075 | Pos_rel | 0,0975 | C2_Q2   | 0,0907 | C1_Q2  | 0,0848 | C2_Q1  | 0,0824 | 6,7815  | 128,8413 | 11,3508 |
| PRO   | 1879 | T_Q1    | 0,1811 | C2_Q1   | 0,1420 | Pos_rel | 0,1304 | T_Q2    | 0,1225 | C1_Q1  | 0,0931 | C2_Q2  | 0,0846 | 3,0363  | 40,1024  | 6,3326  |
| SER   | 2723 | T_Q2    | 0,1983 | Pos_rel | 0,1660 | T_Q1    | 0,1421 | C2_Q2   | 0,1014 | C1_Q2  | 0,0947 | C2_Q1  | 0,0831 | 2,2340  | 13,5833  | 3,6855  |
| THR   | 2575 | T_Q1    | 0,2509 | T_Q2    | 0,1206 | Pos_rel | 0,1080 | C2_Q2   | 0,0893 | C2_Q1  | 0,0879 | C1_Q2  | 0,0852 | 2,9687  | 25,0911  | 5,0091  |
| CYS   | 12   | Fun-8   | 0,0659 | Chem-1  | 0,0390 | Fun9    | 0,0370 | Pos_rel | 0,0362 | Chem-7 | 0,0319 | Chem-4 | 0,0274 | 1,6636  | 4,8609   | 2,2047  |
| ASN   | 850  | T_Q1    | 0,1267 | T_Q2    | 0,1155 | C2_Q2   | 0,1120 | C2_Q1   | 0,0922 | C1_Q1  | 0,0890 | Fun9   | 0,0858 | 3,1648  | 20,6769  | 4,5472  |
| GLN   | 2504 | T_Q1    | 0,1481 | C1_Q1   | 0,1115 | T_Q2    | 0,1071 | C1_Q2   | 0,0917 | C2_Q1  | 0,0867 | C2_Q2  | 0,0860 | 9,4416  | 179,4646 | 13,3964 |
| PHE   | 2928 | Pos_rel | 0,1603 | T_Q2    | 0,1237 | T_Q1    | 0,1130 | C1_Q2   | 0,0866 | C1_Q1  | 0,0851 | C2_Q1  | 0,0814 | 8,8567  | 180,9724 | 13,4526 |
| TYR   | 1275 | Pos_rel | 0,1397 | C2_Q1   | 0,1279 | T_Q1    | 0,1233 | T_Q2    | 0,1170 | C1_Q1  | 0,1087 | C1_Q2  | 0,0800 | 11,2591 | 273,9231 | 16,5506 |
| TRP   | 947  | T_Q2    | 0,1862 | T_Q1    | 0,1788 | C1_Q2   | 0,0974 | C2_Q2   | 0,0894 | C2_Q1  | 0,0854 | C1_Q1  | 0,0818 | 7,7724  | 197,0886 | 14,0388 |
| LYS   | 8821 | T_Q2    | 0,1428 | T_Q1    | 0,1386 | C2_Q2   | 0,1131 | Pos_rel | 0,1099 | C1_Q2  | 0,1015 | C2_Q1  | 0,1008 | 12,9321 | 364,3683 | 19,0884 |
| HIS   | 5258 | T_Q2    | 0,1385 | T_Q1    | 0,1260 | C1_Q2   | 0,1028 | Pos_rel | 0,0961 | C2_Q2  | 0,0942 | C1_Q1  | 0,0861 | 6,0178  | 96,9934  | 9,8485  |
| ARG   | 1572 | Pos_rel | 0,2599 | T_Q1    | 0,1304 | Chem4   | 0,1207 | T_Q2    | 0,0849 | C1_Q1  | 0,0598 | C2_Q2  | 0,0560 | 14,8545 | 582,3117 | 24,1311 |
| ASP   | 3293 | Pos_rel | 0,2869 | T_Q1    | 0,1025 | T_Q2    | 0,1008 | C1_Q1   | 0,0839 | C2_Q1  | 0,0800 | C1_Q2  | 0,0793 | 4,2591  | 35,5586  | 5,9631  |
| GLU   | 6404 | Pos_rel | 0,1467 | T_Q2    | 0,1184 | T_Q1    | 0,0973 | Chem3   | 0,0885 | C2_Q1  | 0,0773 | C1_Q1  | 0,0773 | 7,4725  | 107,1938 | 10,3534 |

**Table S12.** Features Importance MLP: the features and their scores, that have most influenced lysine volume prediction, training MLP on data set containing information about the 9 amino acids preceding and following AA<sub>0</sub> in the protein without their volumes.

| Amino | FREQ | F1      | Val    | F2      | Val    | F3      | Val    | F4      | Val    | F5      | Val    | F6      | Val    | MAE     | MSE      | RMS     |
|-------|------|---------|--------|---------|--------|---------|--------|---------|--------|---------|--------|---------|--------|---------|----------|---------|
| GLY   | 5672 | Pos_rel | 0,1315 | T_Q1    | 0,1271 | T_Q2    | 0,1196 | Hydro-6 | 0,0853 | Chem4   | 0,0770 | Hydro3  | 0,0692 | 1,6121  | 4,9393   | 2,2225  |
| ALA   | 7694 | T_Q2    | 0,0918 | T_Q1    | 0,0826 | Pos_rel | 0,0532 | Hydro-4 | 0,0403 | Hydro-5 | 0,0315 | Chem-5  | 0,0152 | 1,8956  | 8,2349   | 2,8697  |
| VAL   | 3572 | Chem8   | 0,1403 | Hydro-8 | 0,0864 | Chem-1  | 0,0454 | Hydro-4 | 0,0360 | T_Q1    | 0,0357 | Chem-4  | 0,0257 | 4,1212  | 36,6524  | 6,0541  |
| LEU   | 8229 | T_Q2    | 0,1240 | T_Q1    | 0,1189 | Chem-6  | 0,0663 | Hydro5  | 0,0639 | Hydro-2 | 0,0391 | Chem5   | 0,0372 | 6,7312  | 93,1337  | 9,6506  |
| ILE   | 4101 | T_Q1    | 0,0211 | Pos_rel | 0,0182 | Hydro5  | 0,0157 | Hydro9  | 0,0128 | T_Q2    | 0,0105 | Hydro-8 | 0,0103 | 6,8182  | 93,1517  | 9,6515  |
| MET   | 1105 | Chem9   | 0,0771 | Hydro-2 | 0,0678 | Chem-1  | 0,0470 | Pos_rel | 0,0342 | Chem-3  | 0,0321 | T_Q2    | 0,0298 | 7,6145  | 124,5784 | 11,1615 |
| PRO   | 1879 | T_Q1    | 0,0614 | T_Q2    | 0,0240 | Pos_rel | 0,0237 | Chem-4  | 0,0175 | Hydro3  | 0,0119 | Chem-7  | 0,0105 | 3,7529  | 48,0048  | 6,9286  |
| SER   | 2724 | Pos_rel | 1,2545 | T_Q3    | 1,1299 | T_Q2    | 1,0989 | Chem6   | 1,0587 | Chem10  | 1,0378 | Fun-6   | 1,0267 | 3,8237  | 17,9648  | 5,1188  |
| THR   | 2575 | T_Q1    | 0,1608 | T_Q2    | 0,1483 | Chem7   | 0,0364 | Fun-5   | 0,0134 | Hydro-4 | 0,0133 | Hydro1  | 0,0132 | 3,7133  | 30,9326  | 5,5617  |
| CYS   | 12   | T_Q1    | 0,0461 | Pos_rel | 0,0084 | Chem-9  | 0,0022 | Chem3   | 0,0013 | Fun-6   | 0,0012 | Hydro-6 | 0,0011 | 2,0410  | 5,0489   | 2,2470  |
| ASN   | 850  | T_Q2    | 0,1876 | Pos_rel | 0,1855 | Chem-9  | 0,0669 | Hydro-3 | 0,0644 | Hydro-9 | 0,0525 | Chem2   | 0,0451 | 3,9476  | 25,3953  | 5,0394  |
| GLN   | 2504 | Pos_rel | 0,1150 | T_Q1    | 0,0434 | Hydro-9 | 0,0407 | Chem-9  | 0,0287 | Fun-9   | 0,0286 | Chem-6  | 0,0224 | 10,7624 | 211,8817 | 14,5562 |
| PHE   | 2928 | Chem-1  | 0,1004 | Hydro7  | 0,0528 | Chem-7  | 0,0439 | T_Q1    | 0,0433 | T_Q2    | 0,0312 | Chem7   | 0,0219 | 12,1458 | 261,9531 | 16,1850 |
| TYR   | 1275 | T_Q1    | 0,0296 | Pos_rel | 0,0202 | Fun4    | 0,0162 | Hydro4  | 0,0140 | Chem4   | 0,0061 | Chem6   | 0,0044 | 14,0738 | 328,5074 | 18,1248 |
| TRP   | 947  | Hydro1  | 0,0123 | Fun1    | 0,0079 | Chem-2  | 0,0025 | Chem-6  | 0,0007 | Chem7   | 0,0004 | Hydro8  | 0,0001 | 8,6417  | 204,3007 | 14,2934 |
| LYS   | 8821 | T_Q2    | 0,2676 | T_Q1    | 0,1934 | Pos_rel | 0,1222 | Hydro-9 | 0,0480 | Chem-5  | 0,0471 | Chem4   | 0,0396 | 15,6154 | 451,5171 | 21,2489 |
| HIS   | 5258 | T_Q2    | 0,3339 | T_Q1    | 0,2945 | Hydro8  | 0,0734 | Chem6   | 0,0733 | Chem3   | 0,0508 | Pos_rel | 0,0467 | 7,5599  | 122,2233 | 11,0555 |
| ARG   | 1572 | Pos_rel | 0,1728 | T_Q2    | 0,1509 | T_Q1    | 0,1340 | Chem4   | 0,1005 | Chem1   | 0,0110 | Hydro3  | 0,0099 | 15,9363 | 591,0136 | 24,3108 |
| ASP   | 3293 | T_Q2    | 0,1385 | Pos_rel | 0,0930 | T_Q1    | 0,0785 | Chem-4  | 0,0656 | Chem6   | 0,0423 | Chem-6  | 0,0224 | 5,1691  | 46,9522  | 6,8522  |
| GLU   | 6404 | T_Q1    | 0,2719 | T_Q2    | 0,1062 | Hydro-5 | 0,0477 | Hydro-1 | 0,0395 | Chem-1  | 0,0308 | Pos_rel | 0,0306 | 9,7335  | 160,3813 | 12,6642 |



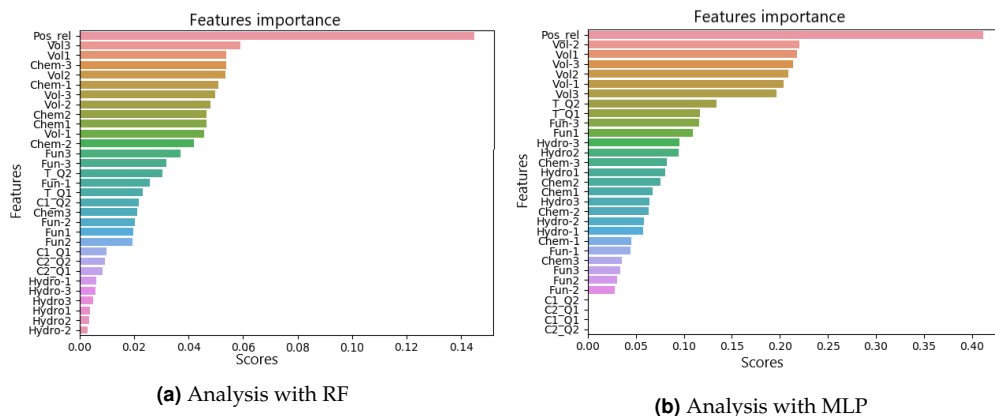

**Fig. S4.** Feature importance obtained for volume prediction of all amino acids, trained on data about the 3 amino acids preceding and following the AA<sub>0</sub> in the primary sequence of the protein.

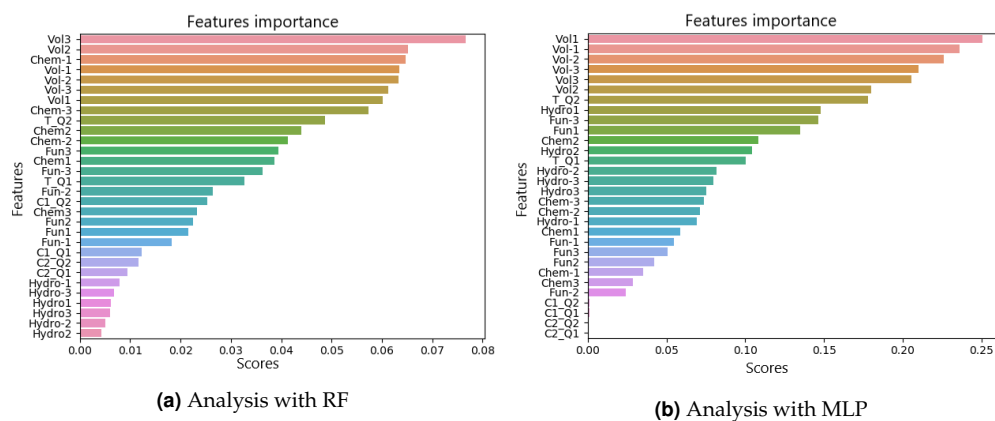

**Fig. S5.** Feature importance obtained for volume prediction of all amino acids, trained on data about the 3 amino acids preceding and following the AA<sub>0</sub> in the primary sequence of the protein, excluding its relative position in the chain.
